# Supplementary material
Source: Springer Nature journal article supplement (https://www.springermedizin.de/resource/supplementary/12885_2009_2099_MOESM3_ESM.pdf/9460524)

ACTACTT★GAG AAGCTGGGCG

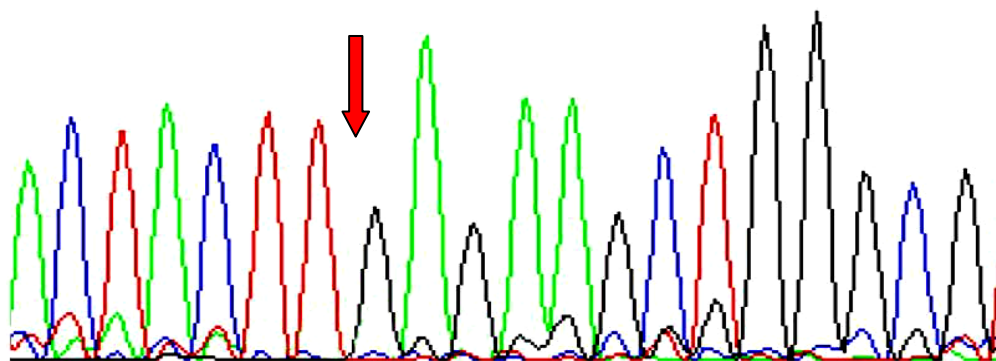

ACTACTTAGACA GAG AAGCTGGGC

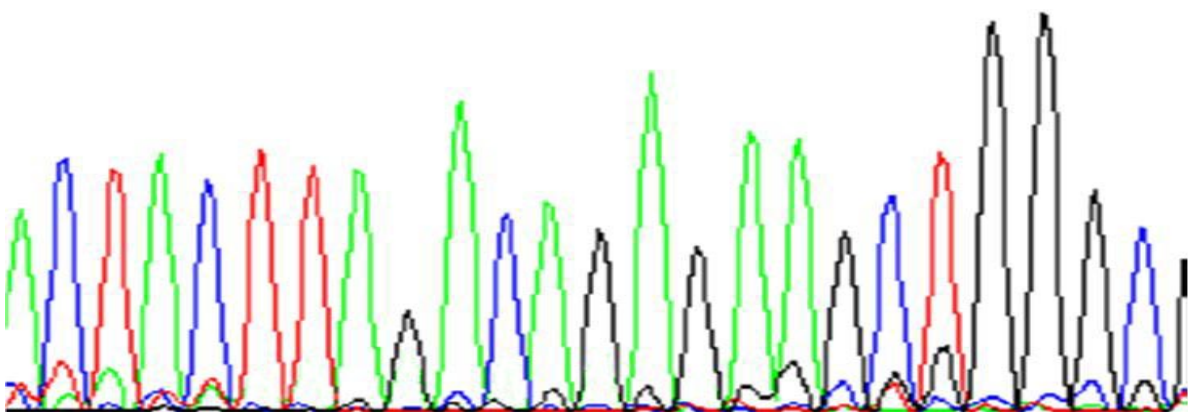

Supplement: MOESM3 [file 9460524]
